# Supplementary material for: Epidemiological Study of Multiple Zoonotic Mosquito-Borne Alphaviruses in Horses in Queensland, Australia (2018–2020)
Source: MDPI journal article supplement (doi:10.3390/v14091846), 2022-08-23
Supplement: s1 [file s1]

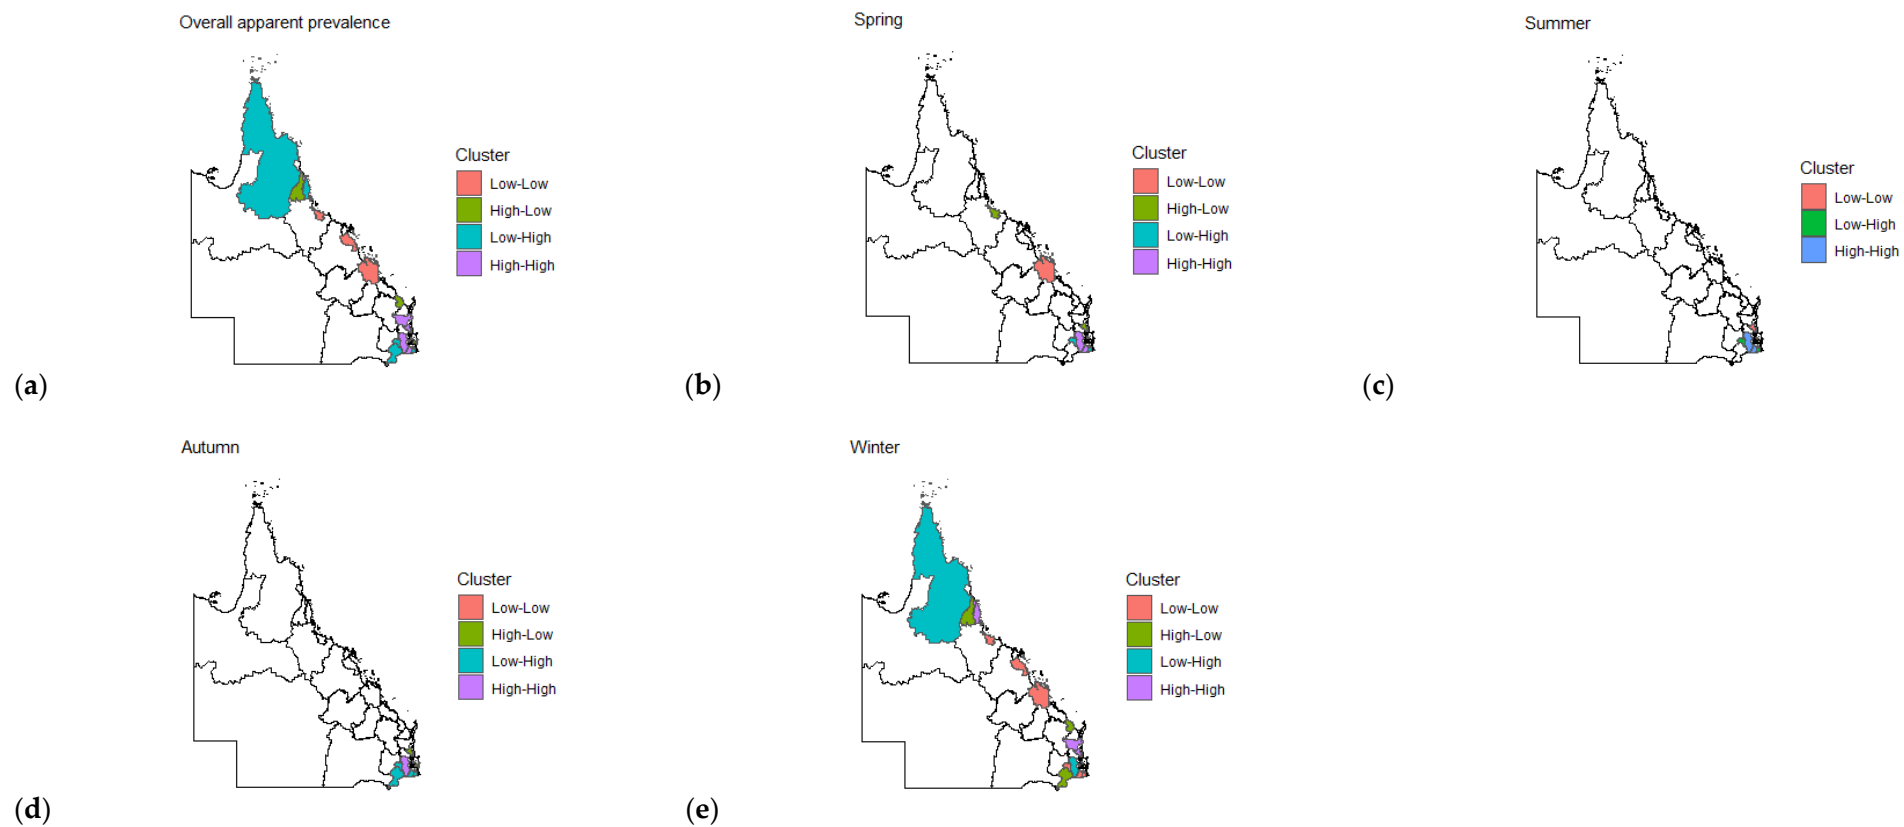

**Figure S1.** Local spatial clustering of RRV seropositivity in QLD categorized by entire dataset (a) and by seasons (b–e): spring (b), summer (c), autumn (d), winter (e).

**Table S1.** Stratified analysis of risk factors categorized by sample populations.

| Risk Factors               | Level    | QRIC                       |                            | UQ                         |                            |
|----------------------------|----------|----------------------------|----------------------------|----------------------------|----------------------------|
|                            |          | RRV sero-positive<br>% (N) | RRV sero-negative<br>% (N) | RRV sero-positive<br>% (N) | RRV sero-negative<br>% (N) |
| Sex                        | Female   | 36.2 (71)                  | 63.8 (125)                 | 82.6 (57)                  | 17.4 (12)                  |
|                            | Male     | 43.7 (139)                 | 56.3 (179)                 | 89.7 (35)                  | 10.3 (4)                   |
|                            | P-value* |                            | 0.097                      |                            | 0.404                      |
| Age at sampling<br>(years) | 2 – 6    | 38.9 (174)                 | 61.1 (273)                 | 77.8 (21)                  | 22.2 (6)                   |
|                            | > 6      | 53.7 (36)                  | 46.3 (31)                  | 87.7 (71)                  | 12.3 (10)                  |
|                            | P-value* |                            | 0.024                      |                            | 0.222                      |
| Season                     | Spring   | 39.6 (38)                  | 60.4 (58)                  | 82.6 (57)                  | 17.4 (12)                  |
|                            | Summer   | 41.3 (50)                  | 58.7 (71)                  | 91.7 (11)                  | 8.3 (1)                    |
|                            | Autumn   | 49.0 (47)                  | 51.0 (49)                  | 83.3 (15)                  | 16.7 (3)                   |
|                            | Winter   | 37.3 (75)                  | 62.7 (126)                 | 100 (9)                    | 0 (0)                      |
|                            | P-value* |                            | 0.295                      |                            | 0.646                      |

\* Fisher's exact test.
